# Supplementary material for: Two three-dimensional porous frameworks built from metal–organic coordination polymer sheets pillared by polyoxometalate clusters
Source: Royal Society of Chemistry journal article supplement (doi:10.1039/c3dt51722e), 2013-01-01
Supplement: c3dt51722e.pdf [file c3dt51722e.pdf]

## Supporting information

### **Two Three-Dimensional Porous Frameworks Built from Metal-Organic Coordination Polymer Sheets Pillared by Polyoxometalate Clusters**

Qing Lan,<sup>a</sup> Jun Zhang,<sup>a</sup> Zhi-Ming Zhang,<sup>\*a</sup> Ying Lu,<sup>a</sup> En-Bo Wang<sup>\*a</sup>

*<sup>a</sup>Key laboratory of Polyoxometalate Science of Ministry of Education, Department of Chemistry,*

*Northeast Normal University, Renmin Street No.5268, Changchun, Jilin, 130024, P. R. China;*

*E-mail: zhangzm178@nenu.edu.cn (Z. M. Zhang), wangeb889@nenu.edu.cn (E. B. Wang)*

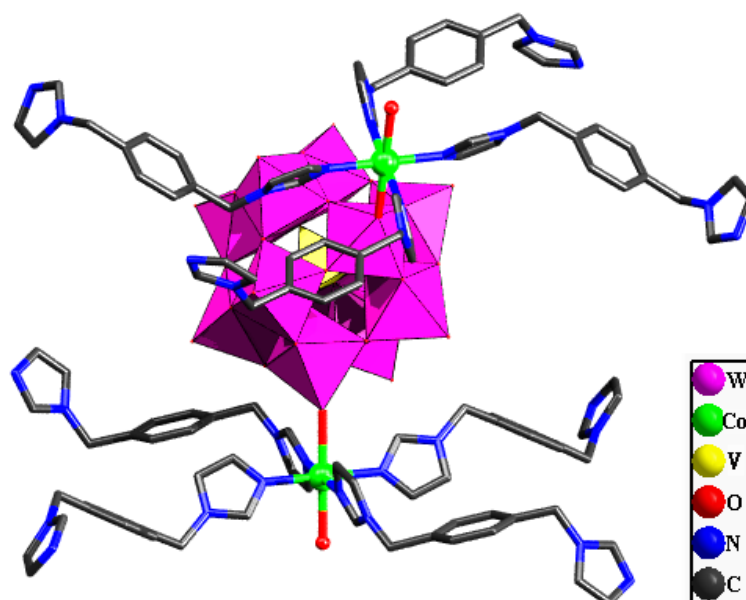

**Fig. S1.** Ball-and-stick view of the structural unit of **2**. The H atoms are omitted for clarity.

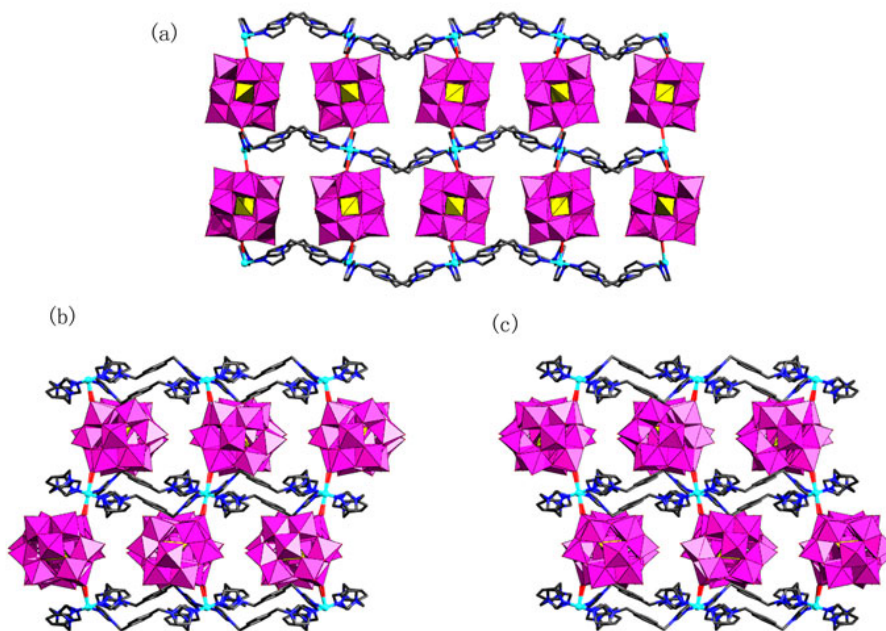

**Fig. S2.** Diagram to 3D framework of compound **1** view along  $[010]$  (a),  $[110]$  (b),  $[-110]$  (c).

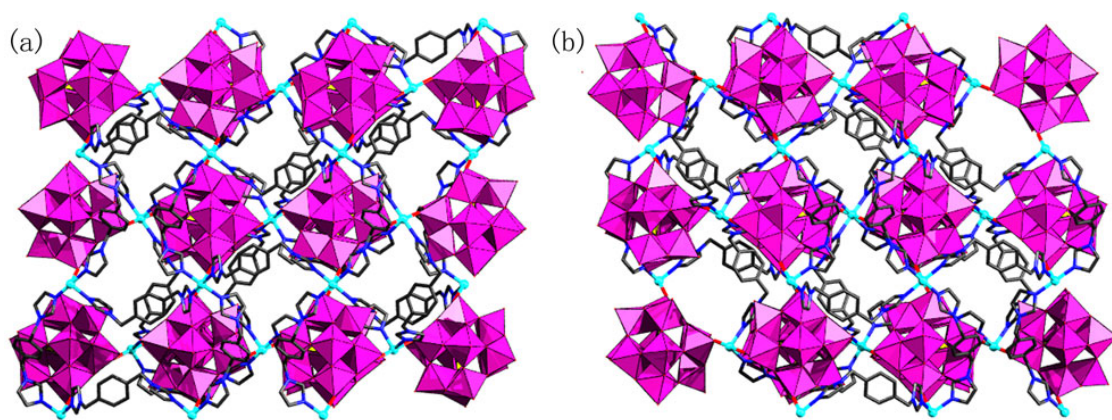

**Fig. S3.** Diagram to 3D framework of compound **1** view along [101] (a), [-101] (b).

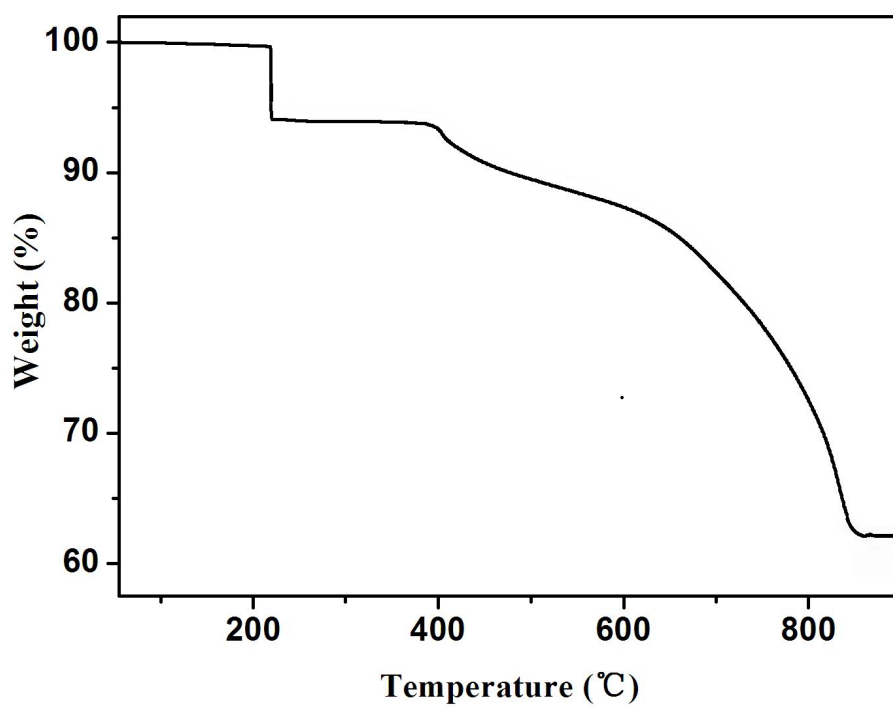

**Fig. S4.** TG curve for compound **1**.

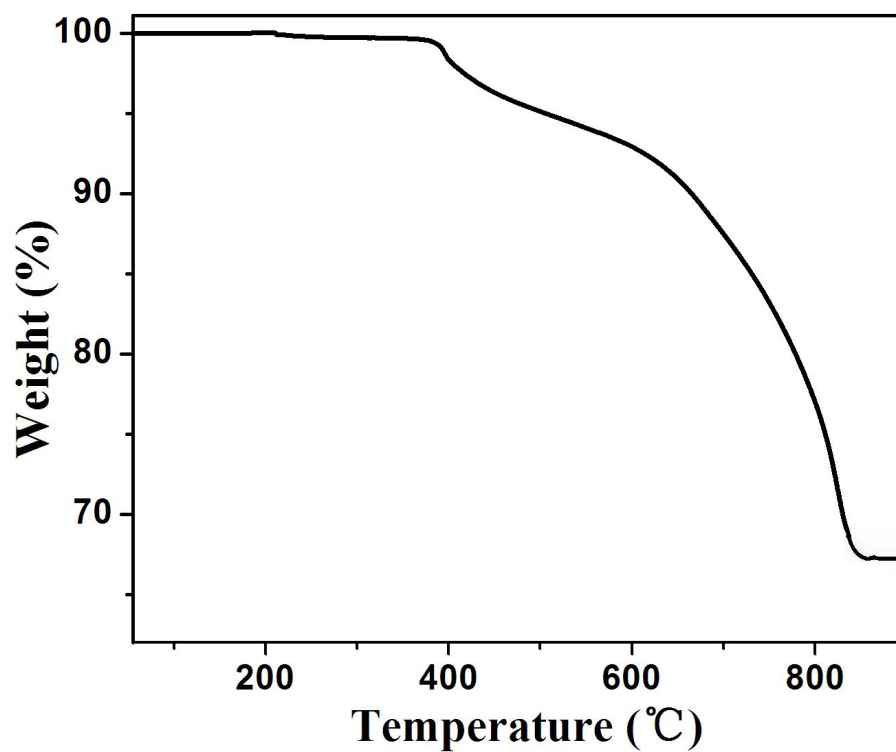

**Fig. S5.** TG curve for compound 1 after activated.

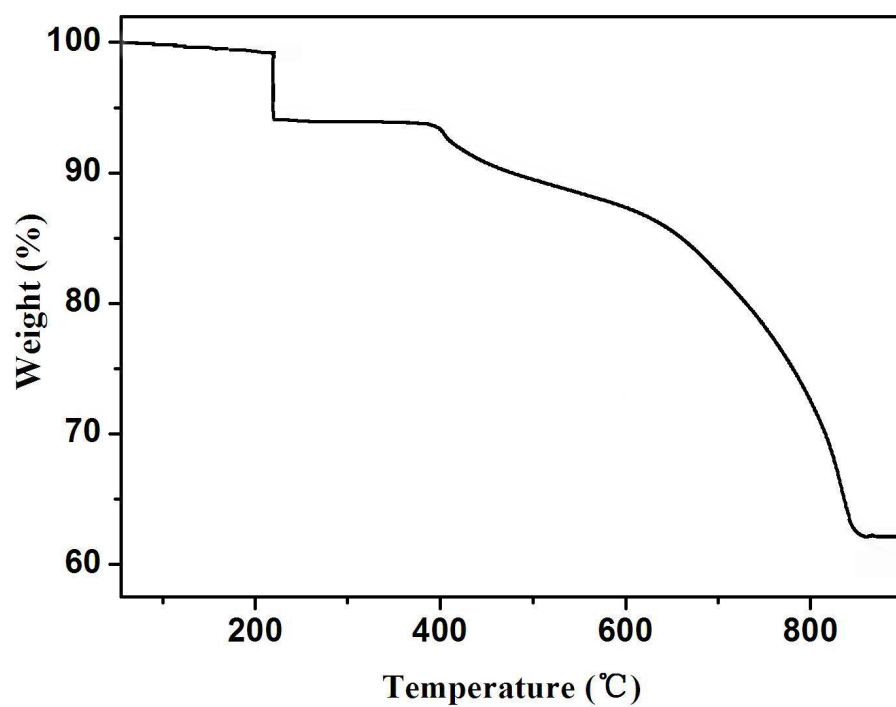

**Fig. S6.** TG curve for compound 2.

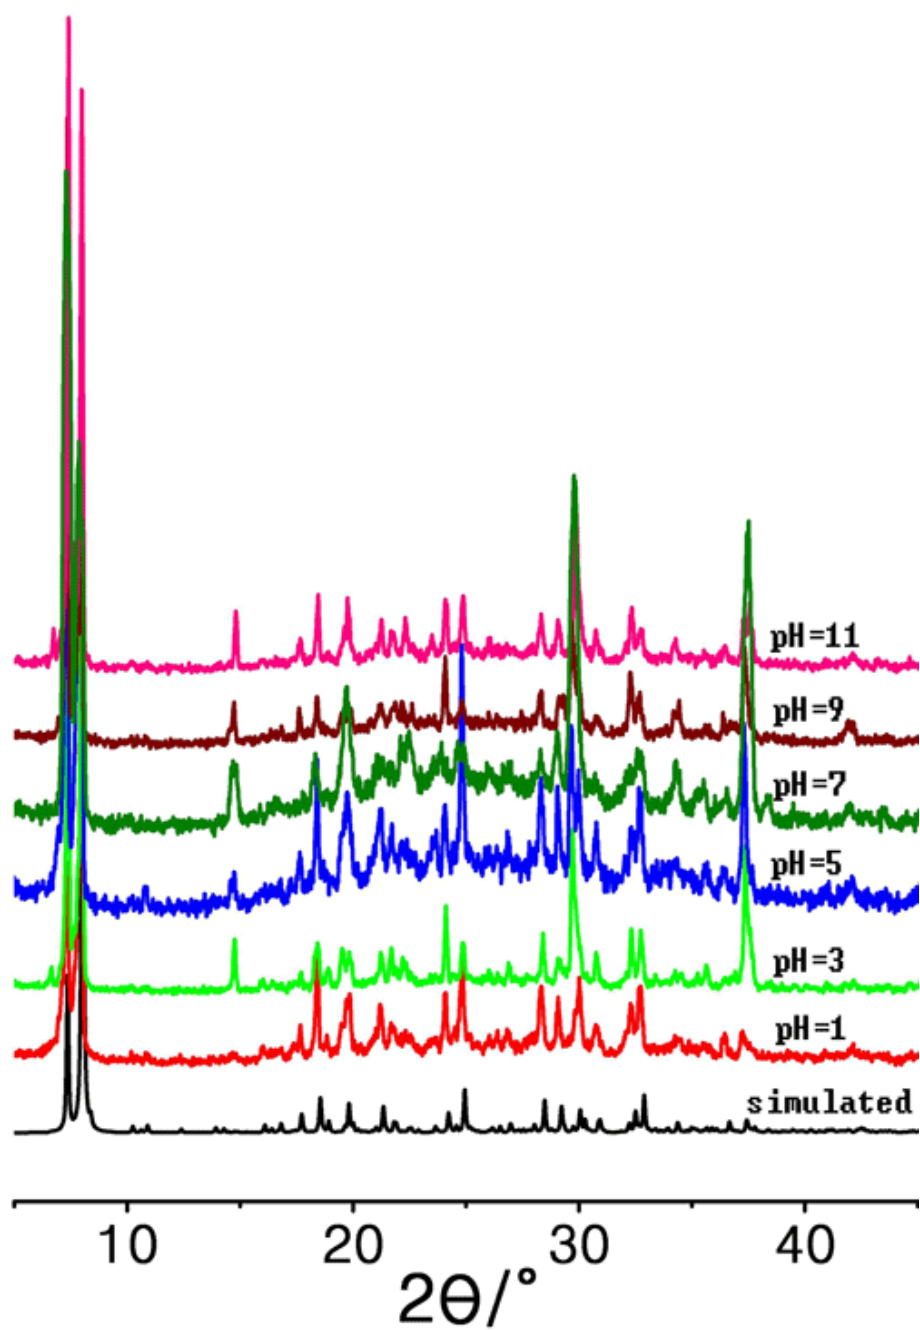

**Fig. S7.** The PXR D data of compound 1 in different pH solution was stirred for 24 h at  $80^\circ\text{C}$

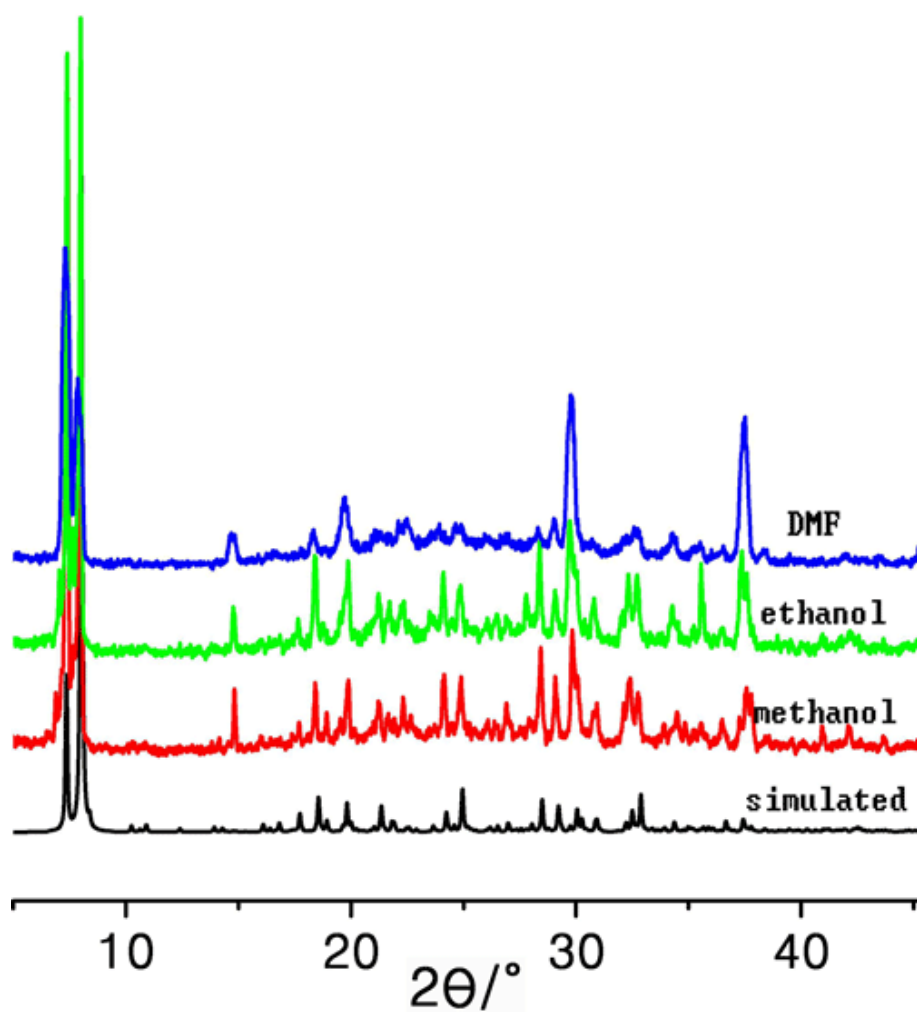

**Fig. S8.** The PXR D data of compound 1 in different organic solvents was stirred for 24 h at 80°C.

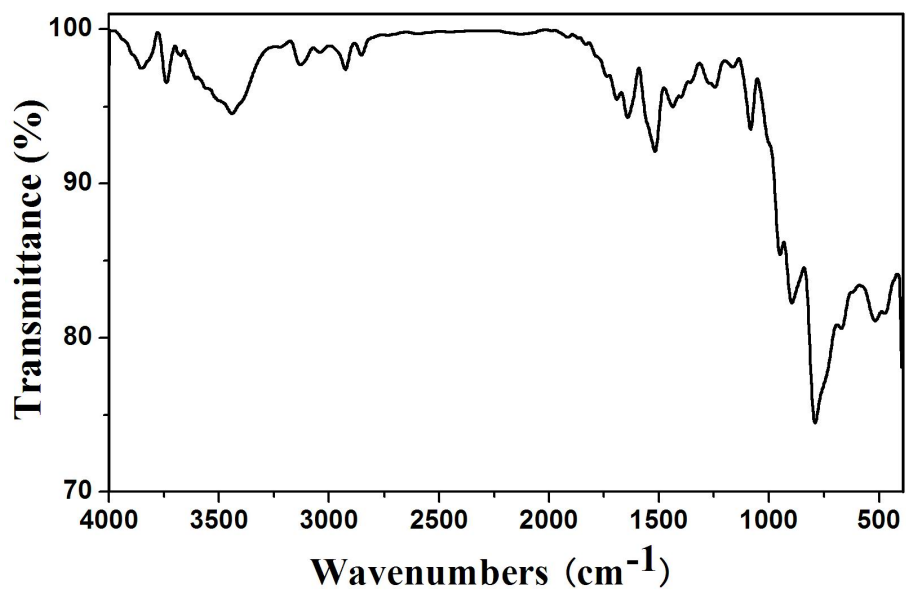

**Fig. S9.** IR spectrum of compound 1.

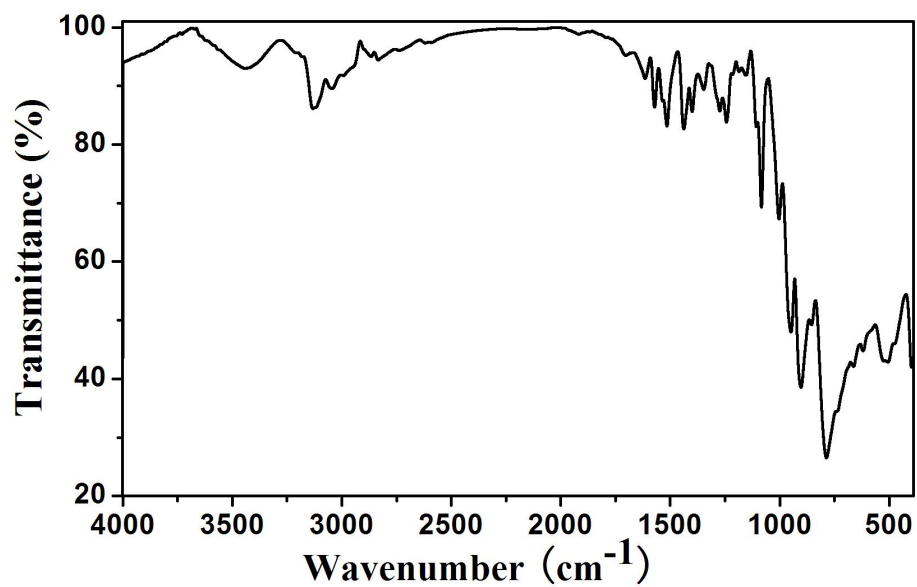

Fig. S10. IR spectrum of compound 2.

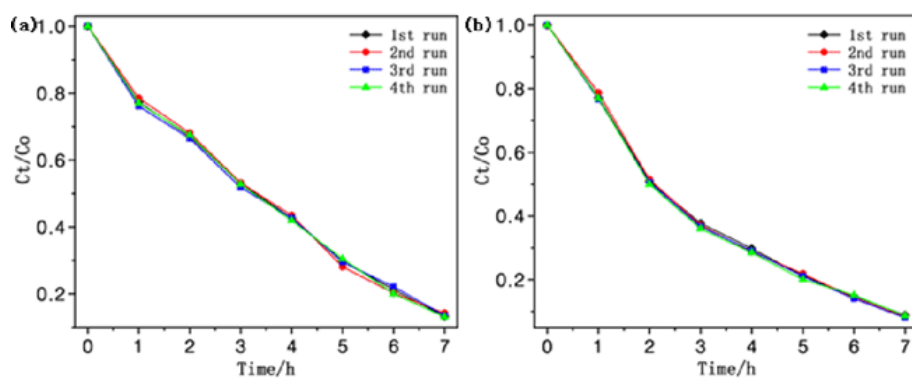

Fig. S11. Four cycles of photocatalytic degradation of RB with compounds 1 (a) and 2 (b).

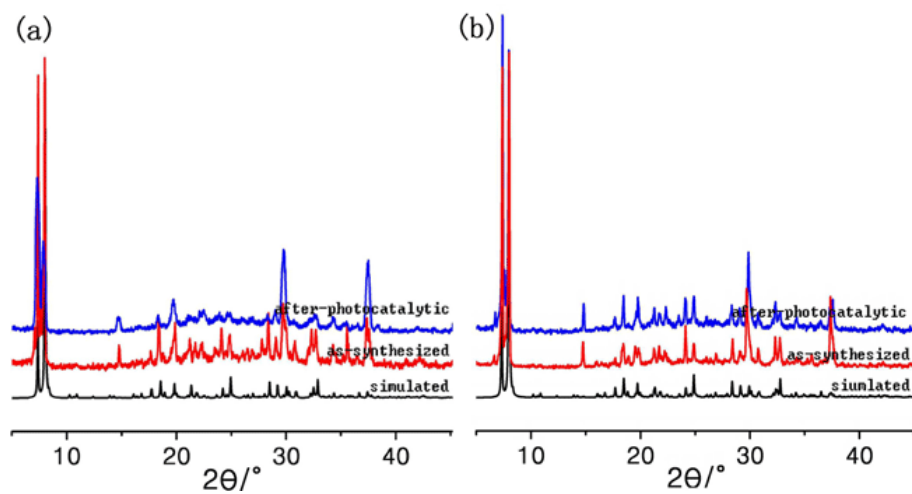

**Fig. S12.** The PXRD patterns of compound 1 (a) and 2 (b) after four cycles of the photocatalytic degradation of RB.

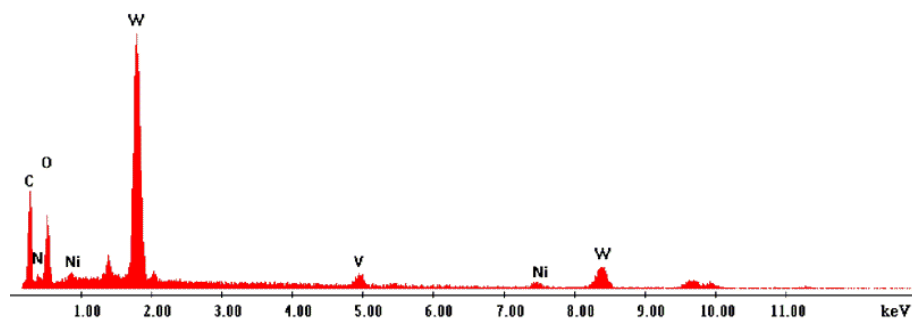

**Fig. S13.** The EDS pattern of compound 1.
